# Supplementary material
Source: PubMed Central journal article supplement (PMC3938114)
Supplement: NIHMS554106-supplement-Supplementary_Data.pdf [file NIHMS554106-supplement-Supplementary_Data.pdf]

## Supplementary Materials for

### **A Monoclonal Antibody Against $\alpha_V\beta_3$ Integrin Inhibits Development of Atherosclerotic Lesions in Diabetic Pigs**

Laura A. Maile, Walker H. Busby, Timothy C. Nichols, Dwight A. Bellinger, Elizabeth P. Merricks, Michael Rowland, Umadevi Veluvolu, David R. Clemmons\*

\*To whom correspondence should be addressed. E-mail: endo@med.unc.edu

Published 10 February 2010, *Sci. Transl. Med.* **2**, 18ra11 (2010)  
DOI: 10.1126/scitranslmed.3000476

#### **This PDF file includes:**

- Fig. S1. Effect of C-loop  $\beta_3$  F(ab)<sub>2</sub> on IGF-1 signaling.
- Fig. S2.  $\beta_3$  phosphorylation in lesions.
- Fig. S3. Effect of C-loop  $\beta_3$  F(ab)<sub>2</sub> infusion on IGF signaling events in porcine arteries.

## Supplemental Material: Figure Legends

### Fig S1 Effect of C-loop $\beta 3$ F(ab)<sub>2</sub> on IGF-I signaling events

SMCs were maintained and treated as described for Fig 1.

**(A)**  $\beta 3$  phosphorylation (left hand panel) was visualized following immunoprecipitation and immunoblotting with an anti-phosphotyrosine antibody (p-Tyr).  $\beta 3$  protein (right hand panel) was visualized by direct immunoblotting with an anti- $\beta 3$  antibody. The arrow indicates the (phosphorylated)  $\beta 3$  subunit.

**(B)** Shc phosphorylation was visualized following immunoprecipitation (IP) with an anti-Shc antibody and immunoblotting (IB) with an anti-phosphotyrosine antibody (p-Tyr; left hand panel). Shc association with Grb-2 was determined by immunoprecipitating with an anti-Shc antibody and immunoblotting with an anti-Grb-2 antibody (middle panel). To control for loading, blots were reprobbed with an anti-Shc antibody (right hand panel).

**(C)** Phosphorylated/total ERK1/2 was visualized following immunoblotting (IB) with an anti-phospho ERK1/2 (left hand panel) or anti-ERK antibody (right hand panel).

**Fig S2  $\beta 3$  phosphorylation in lesions.** Aortic tissue was obtained from 3 hyperglycemic and 3 normoglycemic pigs that were from the same strain and of similar age. Lysates were prepared as described in methods. The lysates were immunoprecipitated using anti- $\beta 3$  antibody and immunoblotted for phosphotyrosine (left hand panel) or immunoblotted using an anti- $\beta 3$  antibody directly (right hand panel), as described in methods. The arrow indicates the (phosphorylated)  $\beta 3$  subunit. The graph shows the extent of the  $\beta 3$  phosphorylation in aortic extracts expressed as scanning units (mean $\pm$ SEM). The aortic tissue was obtained from 8 normoglycemic and to 8 hyperglycemic animals.

**Fig S3: Effect of C-loop  $\beta 3$  F(ab)<sub>2</sub> infusion on IGF signaling events in porcine arteries.**

Femoral artery lysates were prepared as described for fig 3. Proteins were visualized following western immunoblotting (IB) with the appropriate antibody as indicated above each panel. Lanes 1 & 2 (homogenates from arteries that received control vehicle. Lanes 3 & 4 homogenates from arteries that received the anti C-loop  $\beta 3$  F(ab)<sub>2</sub>).

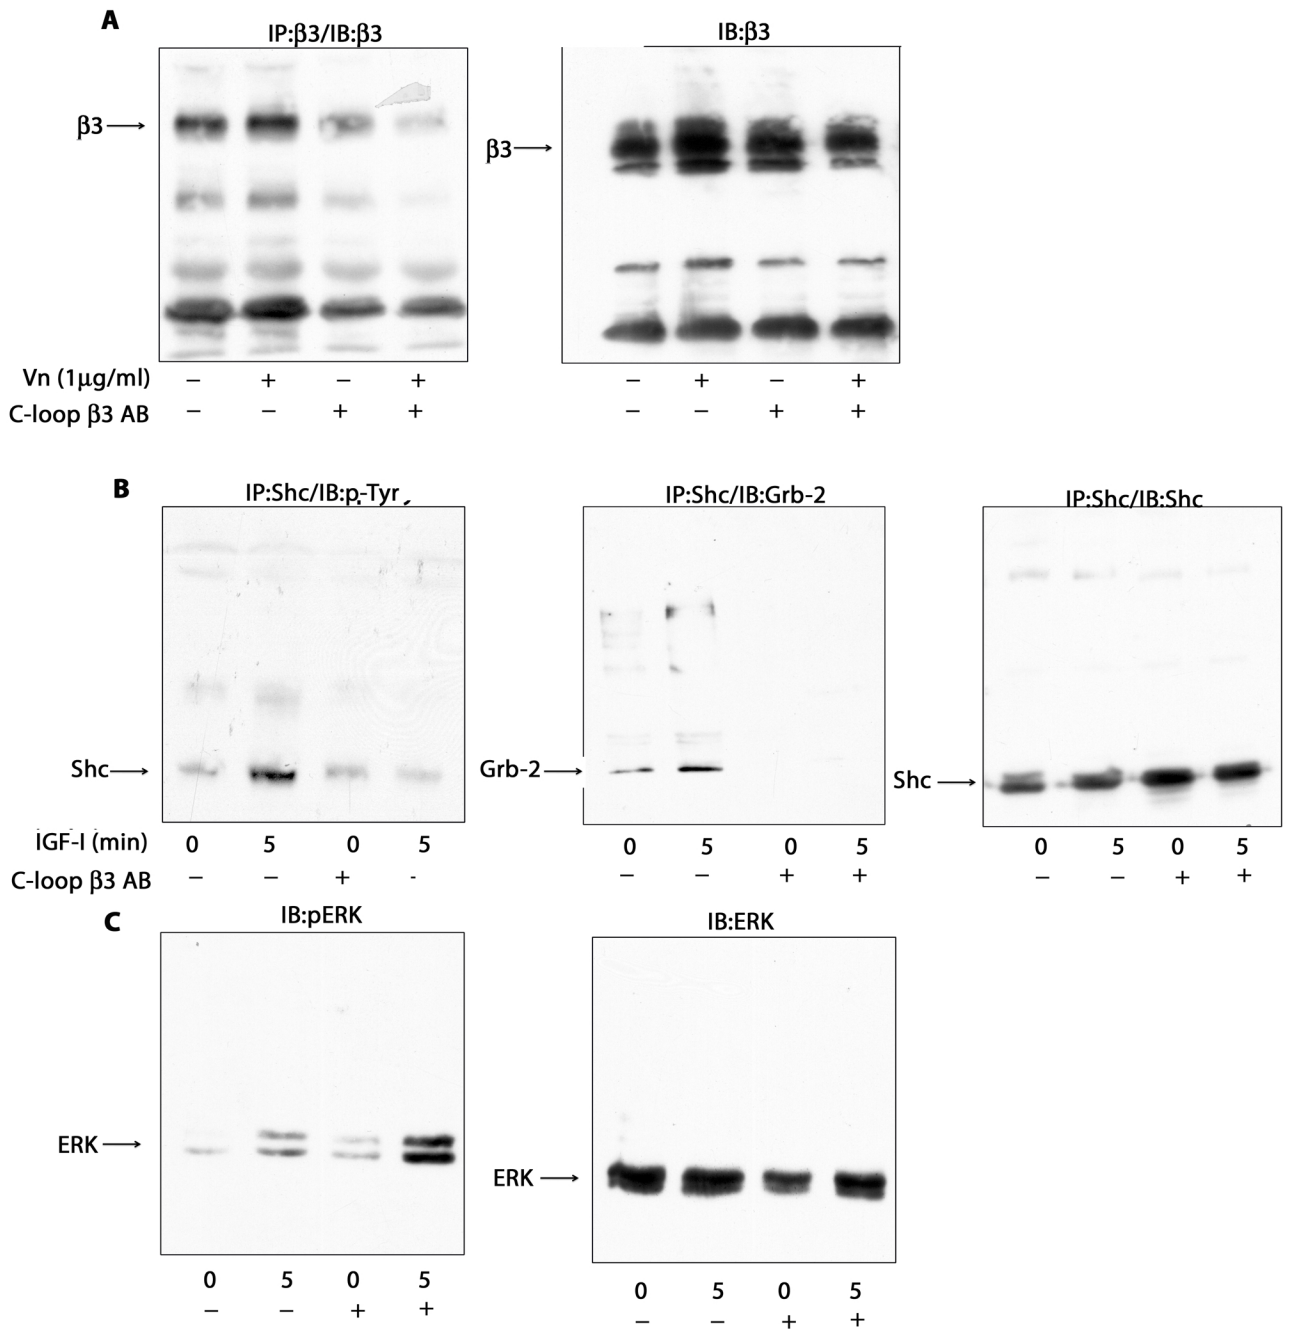

**Figure S1**



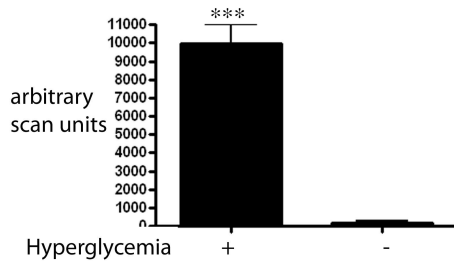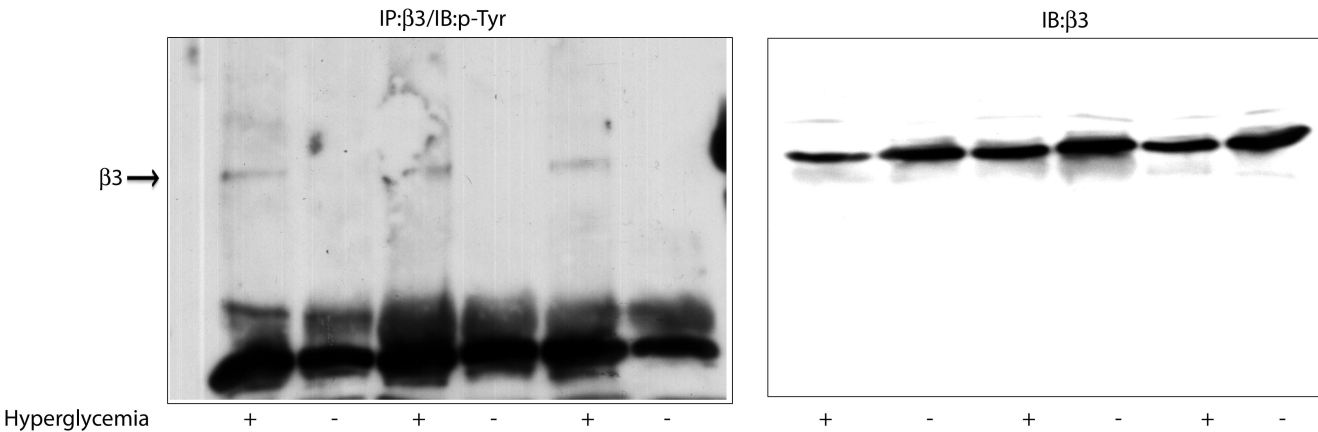

Figure S2

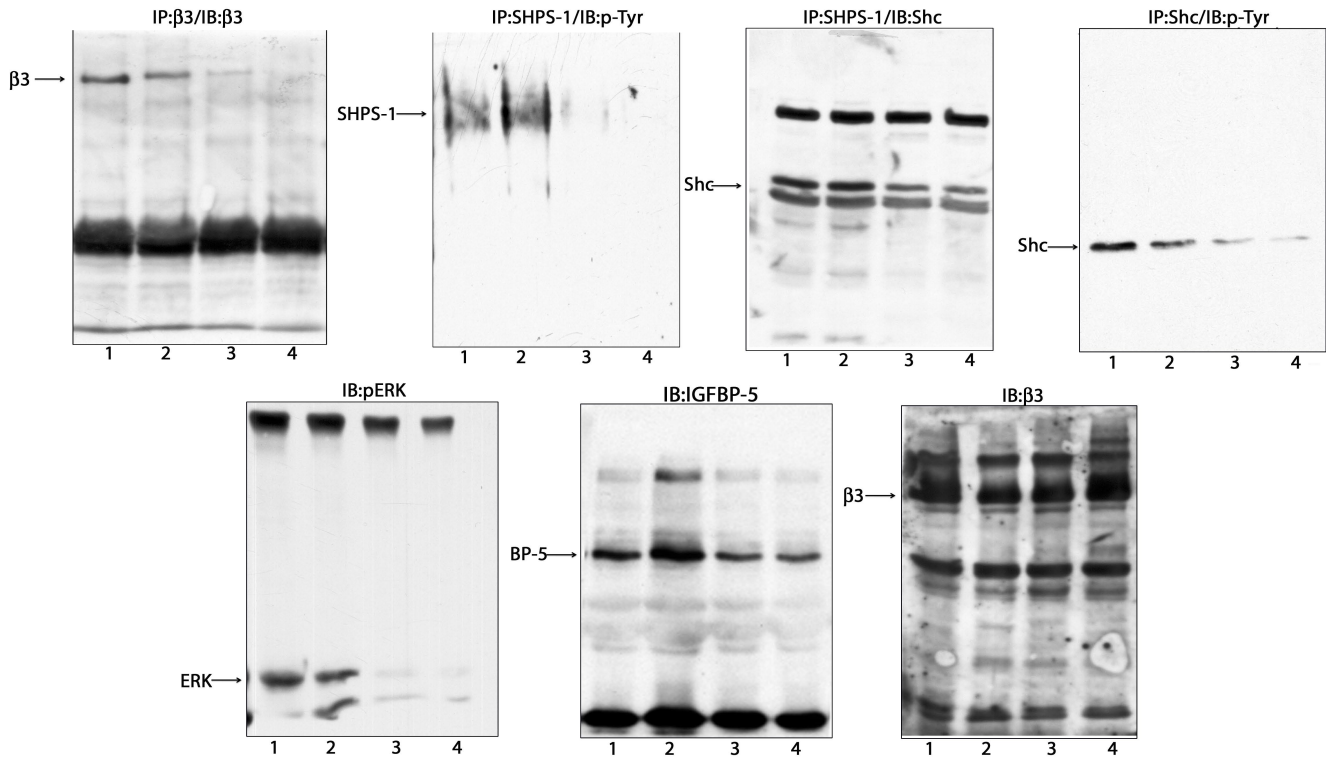

**Figure S3**
